# Supplementary material for: Heterostructured n-ZnO@p-CuO nanosheets filled in a polymer matrix for enhanced electrostatic energy storage performance
Source: Royal Society of Chemistry journal article supplement (doi:10.1039/d4nr03300k), 2024-01-01
Supplement: d4nr03300k1.pdf [file d4nr03300k1.pdf]

**Supplementary Material**

**Heterostructured  $n$ -ZnO@ $p$ -CuO nanosheets filled in  
polymer matrix for enhanced electrostatic energy storage  
performance**

Weixuan Zhang, Yuqing Hu, Xin Zhang, Yingda Zhang, Jinzhang Liu\*

*School of Materials Science and Engineering, Beihang University, Beijing 100191,  
China.*

*\*Corresponding author.*

*E-mail Address: J. Z. Liu ([ljz78@buaa.edu.cn](mailto:ljz78@buaa.edu.cn)).*

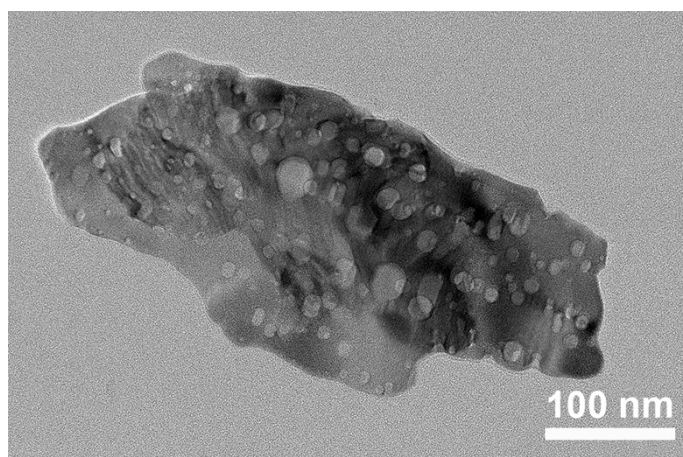

**Fig. S1.** TEM image of a single ZnO nanosheet.

Fig. S2a, b, and c show high-resolution XPS Zn 2p, Cu 2p, and O 1s spectra collected from ZnO@CuO nanosheets. In Fig. S2a, two Zn 2p peaks at 1021.4 eV and 1044.5 eV are identified as Zn-O bonds of Zn<sup>2+</sup> in ZnO. In Fig. S2b, the two peaks at 933.1 eV and 952.2 eV are fitted with Cu 2p<sub>3/2</sub> and Cu 2p<sub>1/2</sub> respectively, and the peaks at 961.9–962.3 eV and 940.5–943.7 eV are the satellite peaks of CuO<sup>S1</sup>. In Fig. S2c, two peaks at 530.3 eV and 532.3 eV are related to metal-oxygen bonds in ZnO and CuO.

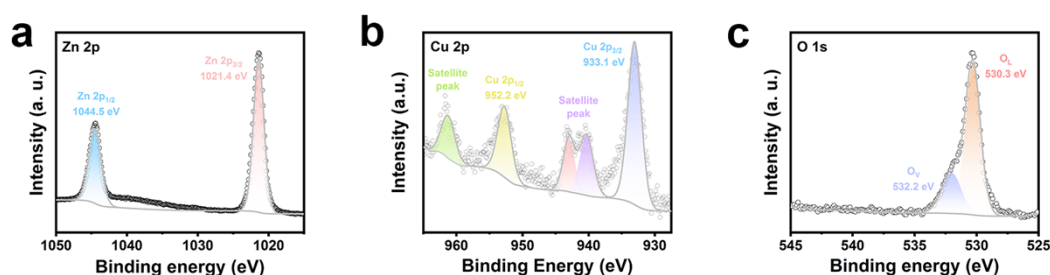

**Fig. S2.** High-resolution (a) Zn 2p, (b) Cu 2p, and (c) O 1s XPS spectra of ZnO@CuO nanosheets.

Fig. S3 exhibits the cross-sectional SEM images of ZnO@CuO/P(VDF-HFP) nanocomposites with different filler contents. The average thickness of the films is

about 15  $\mu\text{m}$ , and the fillers were uniformly distributed in the polymer matrix without obvious agglomeration.

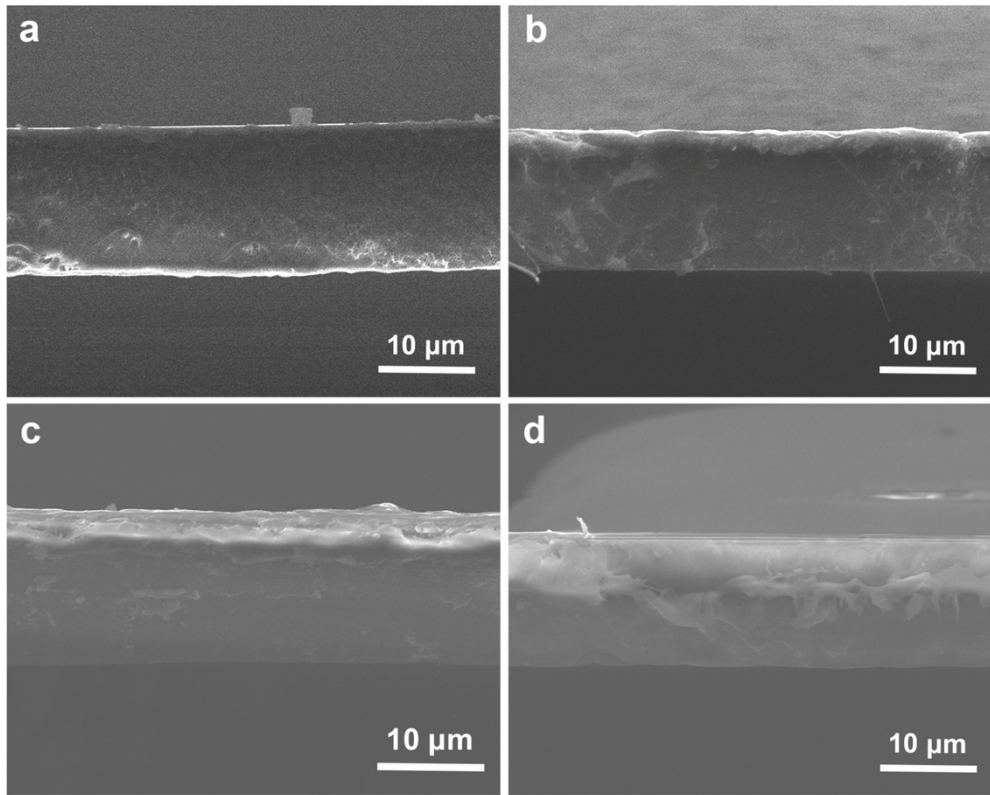

**Fig. S3.** Cross-sectional SEM images of ZnO@CuO/P(VDF-HFP) nanocomposites with (a) 1 wt%, (b) 3 wt%, (c) 5 wt%, and (d) 7 wt% ZnO@CuO nanosheets.

Fig. S4 shows the phase contents of pure P(VDF-HFP) and ZnO@CuO/P(VDF-HFP) films filled with different filler contents. The relative fraction of  $\gamma$  phase can be calculated by:

$$F(\gamma) = \frac{A_{\gamma}}{(K_{\gamma}/K_{\alpha})A_{\alpha} + A_{\gamma}} \quad (\text{S1})$$

Where  $A_{\gamma}$  and  $A_{\alpha}$  are the absorption intensities of  $\gamma$  and  $\alpha$  phases at 835 and 763  $\text{cm}^{-1}$ , respectively;  $K_{\gamma}$  and  $K_{\alpha}$  are the absorption coefficients at the respective wavenumber, which are  $7.7 \times 10^4$  and  $6.1 \times 10^4$   $\text{cm}^2/\text{mol}$ , respectively.<sup>S2</sup>

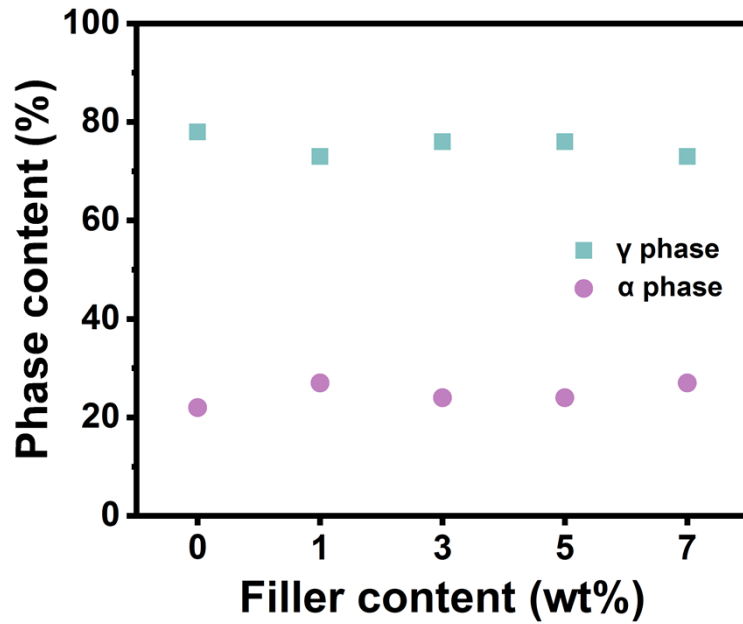

**Fig. S4.** Contents of  $\alpha$  and  $\gamma$  phases in pure P(VDF-HFP) and ZnO@CuO/P(VDF-HFP) films with different filler contents.

Fig. S5 shows the variations of dielectric constant and dielectric loss with increasing the frequency for pure P(VDF-HFP) and ZnO/P(VDF-HFP) nanocomposites with different filler contents. With increasing the filler content from 0 to 5wt%, the dielectric constant and loss were increased slowly. However, the two parameters were abruptly increased when the filler content reaches 7 wt%. It implies that the use of ZnO nanosheet filler requires a larger content to enhance the dielectric constant.

Fig. S6 shows the Weibull distribution of electric breakdown strength of pure P(VDF-HFP) and ZnO/P(VDF-HFP) nanocomposites with different filler contents. Compared with the pure P(VDF-HFP), the breakdown strengths of the nanocomposites were slightly improved, and then decreased. The film with filler

content of 1 wt% exhibits the largest breakdown strength among the ZnO/P(VDF-HFP) nanocomposites.

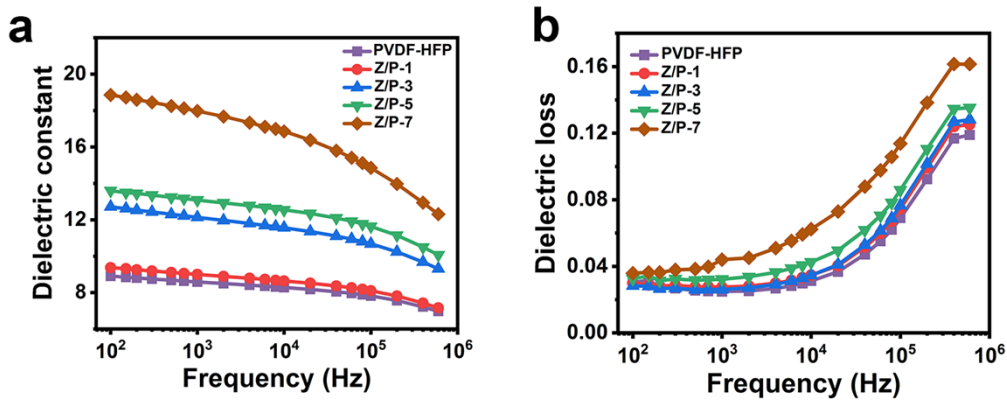

**Fig. S5.** Dependences of (a) dielectric constant and (b) dielectric loss on frequency for pure P(VDF-HFP) and ZnO/P(VDF-HFP) nanocomposites with different filler contents.

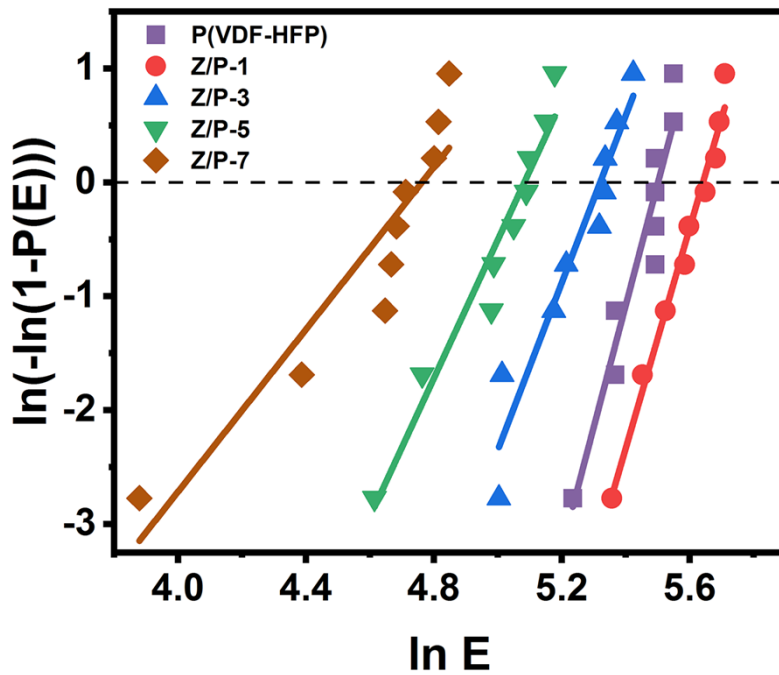

**Fig. S6.** Weibull distribution of electric breakdown strength of pure P(VDF-HFP) and ZnO/P(VDF-HFP) nanocomposites with different filler content.



In Fig. S7, the D-E loops were collected from a pure P(VDF-HFP) film. The electric breakdown strength of a P(VDF-HFP) film is around  $200 \text{ MV m}^{-1}$ . In addition, more D-E loops were collected from ZnO@CuO/P(VDF-HFP) films with filler contents ranging from 1 wt% to 7 wt%, as shown in Fig. S8. The use of 3 wt% filler content leads to the highest electric breakdown strength. For further comparison, D-E loops collected from a group of ZnO/P(VDF-HFP) films are shown in Fig. S9.

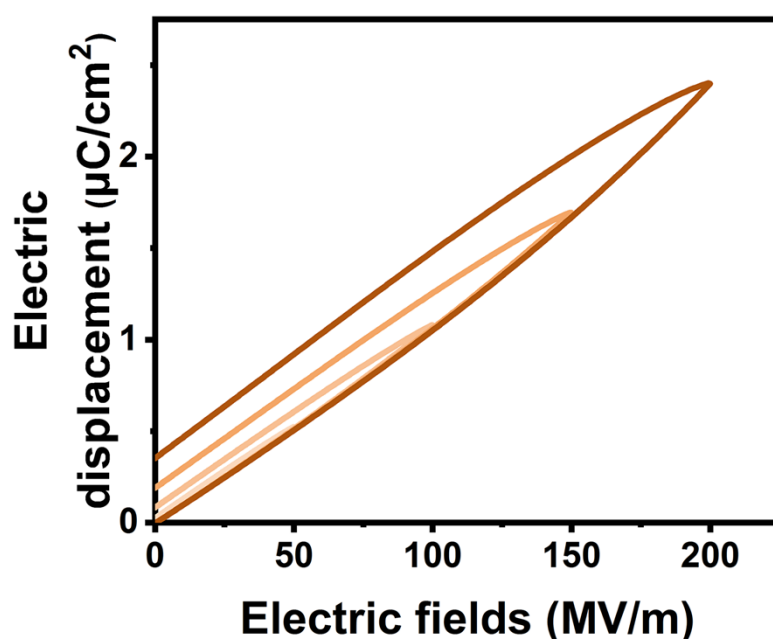

Fig. S7. D-E loops of pure P(VDF-HFP) at different electric fields.

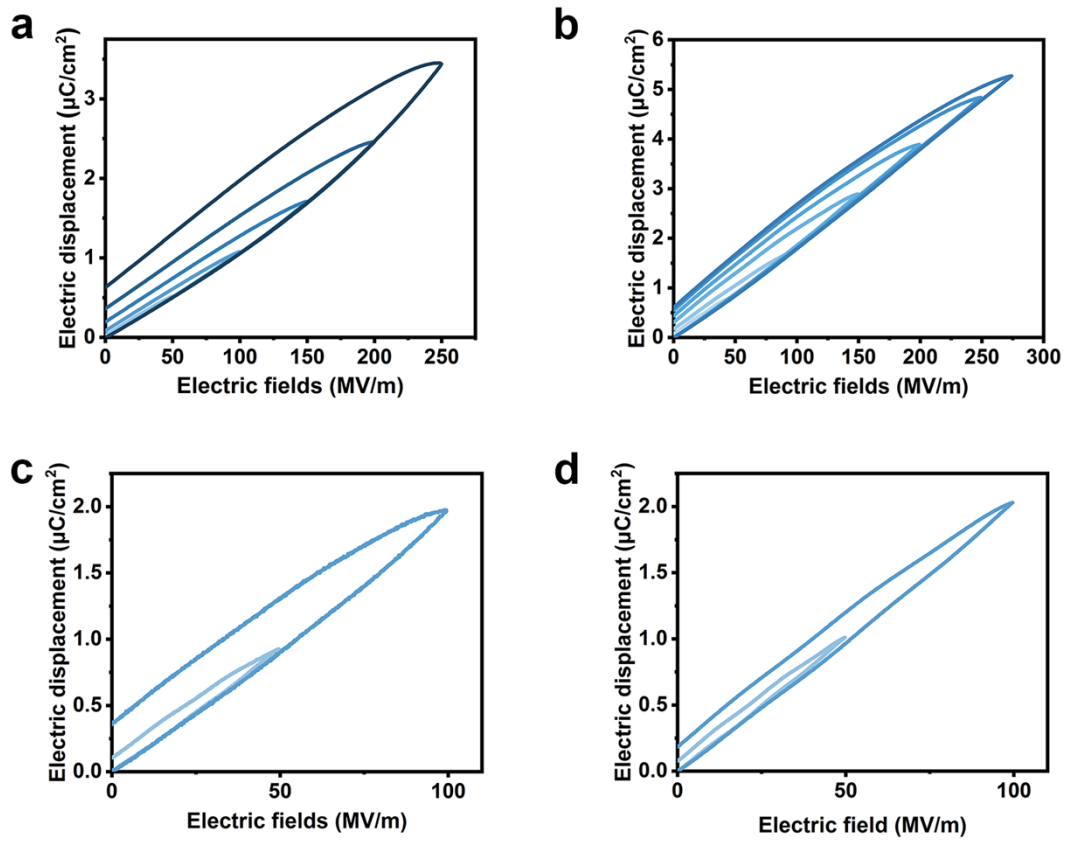

**Fig. S8.** D-E loops of ZnO@CuO/P(VDF-HFP)nanocomposites with (a) 1 wt%, (b) 3 wt%, (c) 5 wt%, and (d) 7 wt% filler content at different electric fields.



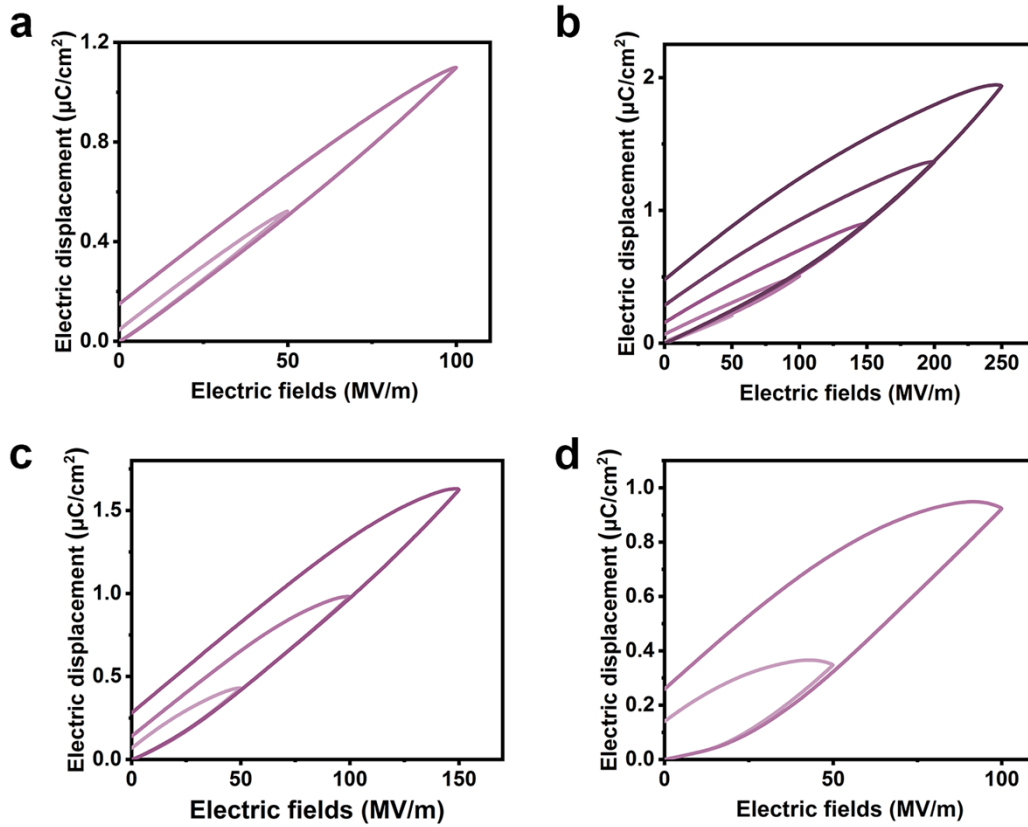

**Fig. S9.** D-E loops of ZnO/P(VDF-HFP)nanocomposites with (a) 1 wt%, (b) 3 wt%, (c) 5 wt%, and (d) 7 wt% filler content at different electric fields.

Fig. S10 exhibits the dielectric energy storage properties of ZnO/P(VDF-HFP) nanocomposites with different filler content. Fig. S10a shows dependences of discharged energy density  $U_d$  and charge-discharge efficiency  $\eta$  on the electric field strength for ZnO/P(VDF-HFP) films. The film with filler content of 3 wt% exhibits largest highest  $U_d$  of  $1.48 \text{ J cm}^{-3}$  at  $250 \text{ MV m}^{-1}$  with  $\eta$  of 52% among the ZnO/P(VDF-HFP) nanocomposites. Fig. S10b shows dependences of maximum and remnant electric displacements on the ZnO nanosheet content and the ZnO/P(VDF-HFP) composite film with 3 wt% filler content exhibits the highest ( $D_{max} - D_r$ ), as

1.46  $\mu\text{C cm}^{-2}$ . The results of calculated  $C_{loss}$  and  $F_{loss}$  for ZnO/P(VDF-HFP) films are shown in Fig. S10c and d, respectively.

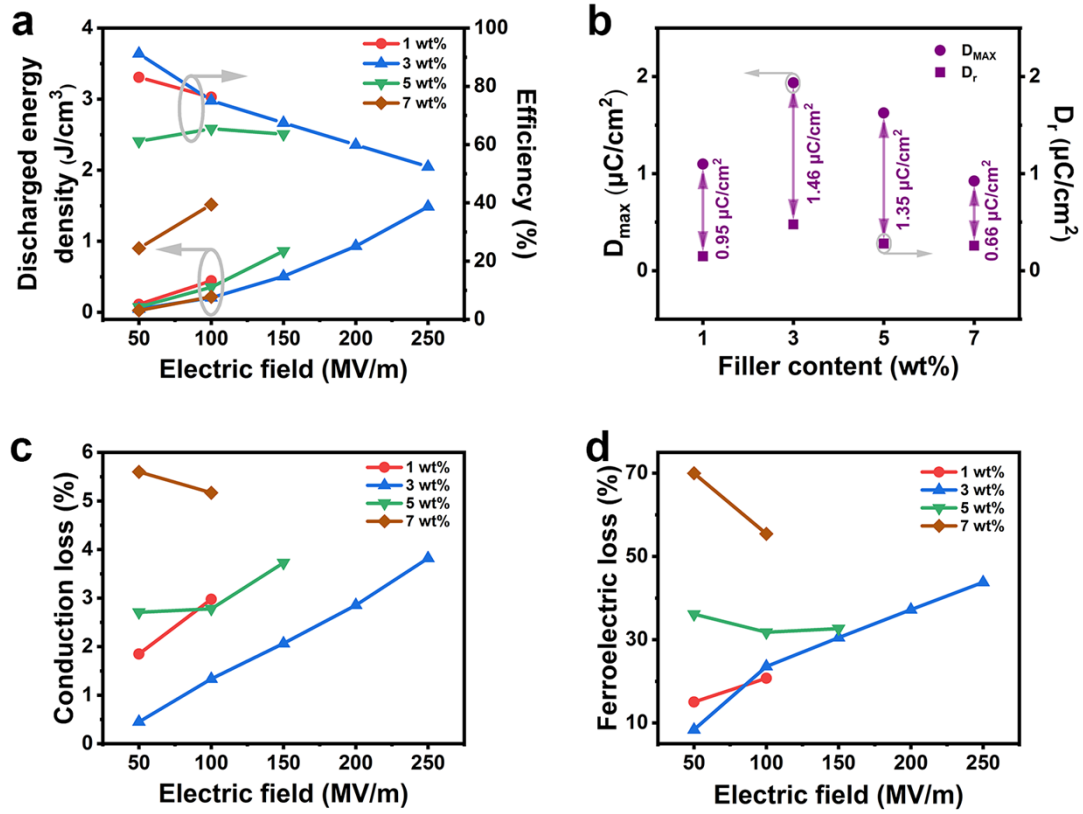

**Fig. S10.** (a) Discharged energy density  $U_d$  and efficiency  $\eta$ , (b) maximum and remnant electric displacement, (c) conduction loss, and (d) ferroelectric loss of ZnO/P(VDF-HFP) nanocomposites with different filler content.

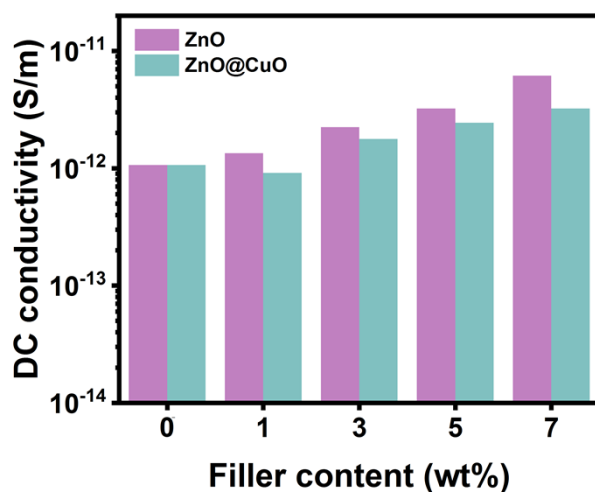

**Fig. S11.** Electrical conductivities of ZnO/P(VDF-HFP) and ZnO@CuO/P(VDF-HFP) composite films with different filler contents.

## References

- [S1] X. Liu, X. Lu, H. Guan, X. Liu, Y. Wang, D. Zhao and M. Wang, *Ceram. Int.*, 2022, 48, 6948–6955.
- [S2] R. Gregorio, and M. Cestari, *J. Polym. Sci. Part B Polym. Phys.*, 1994, 32, 859–870.
